# Supplementary material for: Supra-molecular assembly of a lumican-derived peptide amphiphile enhances its collagen-stimulating activity
Source: Royal Society of Chemistry journal article supplement (doi:10.1039/c5bm00428d), 2015-12-02
Supplement: c5bm00428d1.pdf [file c5bm00428d1.pdf]

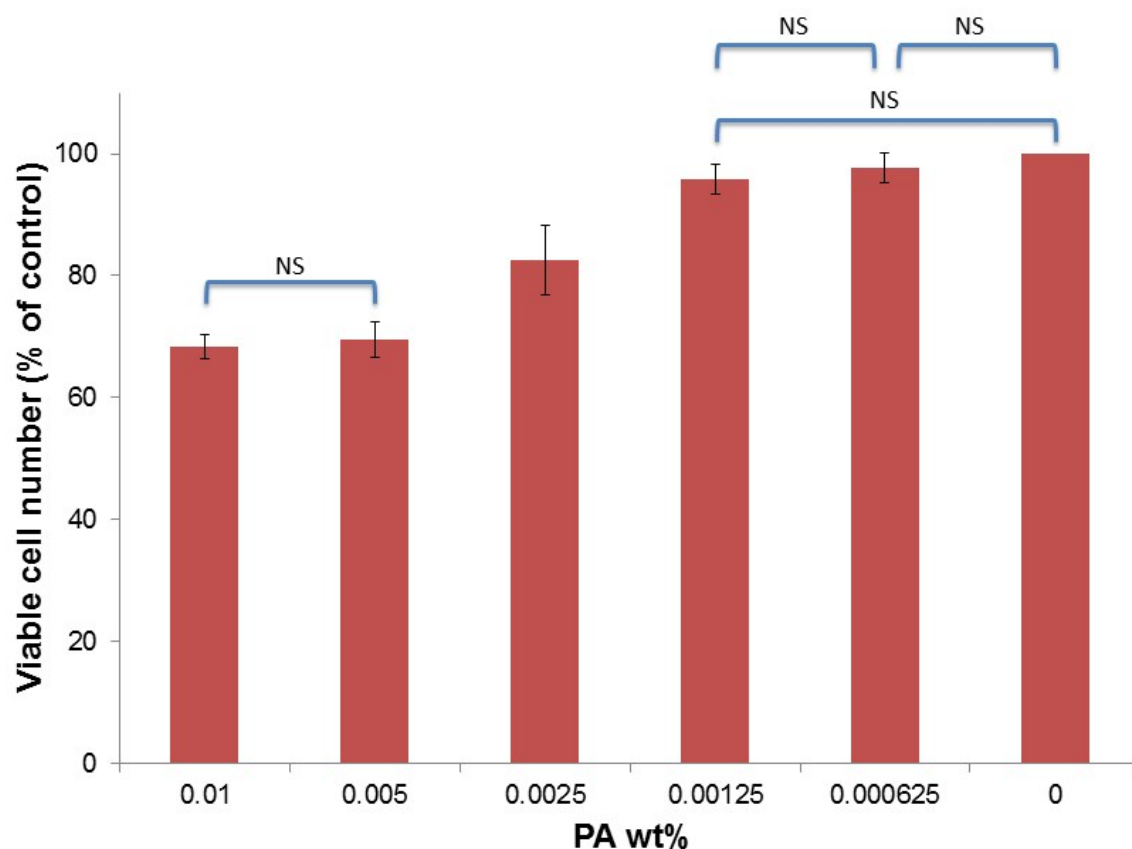

**Supplementary Figure 1.** Cytotoxicity of C<sub>16</sub>-YEALRVANEVTLN. PA supplemented growth medium was well tolerated by human corneal fibroblasts up to concentrations of 0.0025 wt%, maintaining >80% of viable cell number compared to un-supplemented control medium over 72 hours in culture. Moreover, lower concentrations of PA (0.00125 wt% and 0.000625 wt%) showed no significant difference (NS) compared to un-supplemented medium (0 wt%) in terms of toxicity. No individual significant differences were also observed between 0.01 wt% and 0.05 wt%, 0.00125 wt% and 0.000625 wt%, as shown by Tukey's HSD test. All other individual comparisons were significantly different. An overall significant difference was revealed by ANOVA.
